# Supplementary material
Source: PubMed Central journal article supplement (PMC4597890)

| Table S1: Survey of Mouse Phenome Database CGD-MDA1 SNP set for B6 vs B10 polymorphisms |                |               |                  |            |                    |                                             |                          |                                                   |
|-----------------------------------------------------------------------------------------|----------------|---------------|------------------|------------|--------------------|---------------------------------------------|--------------------------|---------------------------------------------------|
| Chr                                                                                     | NCBI build 38  |               | Polymorphic SNPs | Total SNPs | congenic size (Mb) | B6.B10 congenic strain name (chr/Mb format) | latest generation tested | Informative SSLP markers within congenic interval |
|                                                                                         | congenic start | congenic stop |                  |            |                    |                                             |                          |                                                   |
| 1                                                                                       | 21,641,028     | 22,367,196    | 49               | 178        | 0.7                | B6.B10-1/21-22;8/114-117                    | N4F7                     | D1Dcr8, D8Dcr46, 47, 48                           |
| 1                                                                                       | 187,056,961    | 188,938,319   | 169              | 511        | 1.9                | B6.B10-1/187-188                            | N8F7                     | D1Dcr19                                           |
| 2                                                                                       | 9,318,530      | 9,822,955     | 45               | 109        | 0.5                | B6.B10-2/9-10                               | N7F6                     | D2Dcr45                                           |
| 2                                                                                       | 159,389,745    | 164,247,427   | 265              | 1265       | 4.9                | B6.B10-2/159-164                            | N3F14                    | D2Dcr115                                          |
| 4                                                                                       | 85,424,026     | 101,139,995   | 523              | 3663       | 15.7               | B6.B10-4/85-101                             | N11F2                    | D4Dcr10, D4Dcr14                                  |
| 4                                                                                       | 115,888,824    | 142,973,945   | 1462             | 6496       | 27.1               | B6.B10-4/117-143                            | N11F6                    | D4Dcr25, 26, 27, 28, 29                           |
| 6                                                                                       | 7,955,563      | 8,458,659     | 57               | 148        | 0.5                | B6.B10-6/8-9                                | N11F4                    | D6Dcr2, D6Dcr3                                    |
| 8                                                                                       | 22,713,943     | 24,112,792    | 94               | 339        | 1.4                | B6.B10-8/22-109                             | N4F10                    | D8Dcr5, 17, 20, 32, 33, 34, 37                    |
| 8                                                                                       | 48,448,184     | 57,943,948    | 421              | 1750       | 9.5                |                                             |                          |                                                   |
| 8                                                                                       | 94,374,289     | 108,954,590   | 553              | 3268       | 14.6               | B6.B10-8/94-109                             | N4F15                    | D8Dcr32, 33, 34, 37                               |
| 8                                                                                       | 114,544,756    | 117,251,376   | 250              | 738        | 2.7                | B6.B10-1/22;8/114-117                       | N4F7                     | D1Dcr8, D8Dcr46, 47, 48                           |
| 9                                                                                       | 65,711,109     | 69,135,679    | 331              | 1175       | 3.4                | B6.B10-9/65-69                              | N11F5                    | D9Dcr2, 3, 6, 7, 8                                |
| 11                                                                                      | 3,105,931      | 8,644,832     | 388              | 1103       | 5.5                | B6.B10-11/3-57                              | N4F8                     | D11Dcr1, 7, 12, 34                                |
| 11                                                                                      | 37,580,981     | 56,653,819    | 1399             | 4159       | 19.1               |                                             |                          |                                                   |
| 13                                                                                      | 16,316,718     | 22,293,617    | 490              | 1545       | 6.0                | B6.B10-13/16-41                             | N11F5                    | D13Dcr1, 3, 5                                     |
| 13                                                                                      | 31,070,618     | 36,685,498    | 351              | 1260       | 5.6                |                                             |                          |                                                   |
| 13                                                                                      | 39,889,868     | 40,771,645    | 63               | 231        | 0.9                |                                             |                          |                                                   |
| 14                                                                                      | 115,702,035    | 119,622,245   | 154              | 797        | 3.9                | B6.B10-14/115-120                           | N11F9                    | D14Dcr7, D14Dcr9                                  |
| 15                                                                                      | 67,989,428     | 72,421,994    | 272              | 1204       | 4.4                | B6.B10-15/68-73                             | N11F4                    | D15Dcr4                                           |
| 18                                                                                      | 77,379,821     | 77,672,891    | 24               | 77         | 0.3                | B6.B10-18/77-78                             | N11F3                    | D18Dcr3                                           |

| Table S2: SSLP markers polymorphic between B6<br>And B10 |          |               |                               |              |           |                                  |                                  |                          |  |  |  |  |
|----------------------------------------------------------|----------|---------------|-------------------------------|--------------|-----------|----------------------------------|----------------------------------|--------------------------|--|--|--|--|
| Chr                                                      | MGI Name | Alias         | UCSCPosition(NCBI38/mm10)     | B6 Size (bp) | B10 vs B6 | Forward Primer                   | Reverse Primer                   | MIT Markers<br>Colocated |  |  |  |  |
| 1                                                        | D1Dcr8   | D1Dcr22.118   | chr1:22,133,369-22,133,467    | 99           | B6>>B10   | CATCTTAACACTCGCAAAAACACA         | TTTATATACCGCATTGGAGAAAAGTACTT    |                          |  |  |  |  |
| 1                                                        | D1Dcr19  | D1Dcr190.120  | chr1:188,419,328-188,419,425  | 98           | B6>>B10   | GCACCTGAAATCTTCTAGTGTTTTACA      | GAAAGATCCAAGTAGATAGGTGTGTGT      |                          |  |  |  |  |
| 2                                                        | D2Dcr131 | D2Dcr9.520v2  | chr2:9,602,710-9,602,826      | 117          | B6>B10    | TATGTACATATATCCACAATAACAGGCATGTA | TTCTTTTTAAGAAAACATGATTTGTAGGGTAT |                          |  |  |  |  |
| 2                                                        | D2Dcr113 | D2Dcr159.121  | chr2:159,430,118-159,430,237  | 120          | B10>>B6   | TGAGGAAGATACCAATGTCAACCT         | TGACTTGTATGTGGTATGACAGATGC       | D2Mit287                 |  |  |  |  |
| 2                                                        | D2Dcr124 | D2Dcr162.143  | chr2:162,452,335-162,452,432  | 98           | B6>>B10   | CAGATTTCTCTGCCCACACATT           | ATGGGAGGTATGAGAAAGGCTGT          |                          |  |  |  |  |
| 2                                                        | D2Dcr115 | D2Dcr162.885  | chr2:163,194,446-163,194,547  | 102          | B10>>B6   | TTTTTGCAACTTTGTTAAGAATTCCA       | GAAAACACCCCTCCACCCCTT            | D2Mit226                 |  |  |  |  |
| 4                                                        | D4Dcr10  | D4Dcr87.274   | chr4:87,803,407-87,803,508    | 102          | B6>B10    | TTGTCAGCATCTACTCCTAACCATCT       | TCAAACCTGACGGCAGTGAAGT           |                          |  |  |  |  |
| 4                                                        | D4Dcr14  | D4Dcr99.535   | chr4:100,037,690-100,037,789  | 100          | B6>>B10   | TTGAGGCATACACACATCAATTT          | GACACGCAGCCAGTGAATGTA            |                          |  |  |  |  |
| 4                                                        | D4Dcr17  | D4Dcr116.293  | chr4:116,796,039-116,796,142  | 104          | B6>>B10   | GTTTGCTAGGTGCACATCTACACA         | ATTCAAAACATGAGCCGGCATA           |                          |  |  |  |  |
| 4                                                        | D4Dcr25  | D4Dcr127.617  | chr4:128,115,255-128,115,350  | 97           | B10>>B6   | AGACTCCACTTTCTGTCAATGTAGAA       | TCATCCCGTGAACTTCAT               | D4Mit16                  |  |  |  |  |
| 4                                                        | D4Dcr26  | D4Dcr128.357  | chr4:128,855,509-128,855,604  | 96           | B10>B6    | TGTCTAAAACATGCAAGCACACA          | CAAAAACAGCATCAGGGTATTATT         |                          |  |  |  |  |
| 4                                                        | D4Dcr27  | D4Dcr132.699  | chr4:133,427,364-133,427,461  | 98           | B6>>B10   | GCCTCAGGCACCTAAGTACATGT          | GATTCTCCGGCTCACACCT              |                          |  |  |  |  |
| 4                                                        | D4Dcr28  | D4Dcr133.058  | chr4:133,785,938-133,786,036  | 99           | B6>>B10   | CTGATGAAAGAAAACCCAAA             | CACCCAACCAACCATCAAAAT            | D4Mit71                  |  |  |  |  |
| 4                                                        | D4Dcr29  | D4Dcr135.633  | chr4:136,361,089-136,361,191  | 103          | B6>>B10   | CCTCTGCTGACCTCCACATGT            | TGTGTGCTTGTCTACTTGTGTGT          | D4Mit69                  |  |  |  |  |
| 6                                                        | D6Dcr2   | D6Dcr8.203    | chr6:8,253,036-8,253,139      | 104          | B10>>B6   | AGGGAAAATGAGTATGTTAGCAA          | ACAGCTTACTATCTCAAGCATATAATTGAGT  |                          |  |  |  |  |
| 6                                                        | D6Dcr3   | D6Dcr8.237    | chr6:8,287,720-8,287,815      | 96           | B6>>B10   | ACATGTGCACTGTGTATATGAA           | GAGCGCTGATGCATACTAATTTCTGTGT     |                          |  |  |  |  |
| 8                                                        | D8Dcr5   | D8Dcr24.267   | chr8:22,802,019-22,802,114    | 96           | B10>>B6   | AGCCCATCTCTGTGTTTTAA             | TGTGTAACCTACTGAAAGCCAGGAA        |                          |  |  |  |  |
| 8                                                        | D8Dcr17  | D8Dcr52.336   | chr8:50,837,361-50,837,458    | 98           | B10>>B6   | CTTTGACTGCATTGACATTCCTCAT        | CAAGTAAAATGACATAATGCACACACA      | D8Mit205                 |  |  |  |  |
| 8                                                        | D8Dcr20  | D8Dcr56.096   | chr8:54,597,803-54,597,898    | 96           | B10>>B6   | TTTTCAAATCACCTGTCTCTGT           | TGTACCTTGATGATGCGTGTGT           |                          |  |  |  |  |
| 8                                                        | D8Dcr32  | D8Dcr104.407  | chr8:101,518,319-101,518,431  | 113          | B6>>B10   | CCCTGAACAACTCATACAAAACA          | ACAGGAAAGACAGTTACTTCCACATGT      |                          |  |  |  |  |
| 8                                                        | D8Dcr33  | D8Dcr104.626  | chr8:101,737,509-101,737,607  | 99           | B10>B6    | AACAAACCAACCAACATTCATCAT         | GCAAATAAGAAATCAACATAAATCAGTGT    |                          |  |  |  |  |
| 8                                                        | D8Dcr34  | D8Dcr104.710  | chr8:101,820,922-101,821,026  | 105          | B10>>B6   | CCCTATTACTACCAATGAAGGAAT         | AATTGAAAGCACAAAGTGTAGCTCTGT      |                          |  |  |  |  |
| 8                                                        | D8Dcr37  | D8Dcr105.511  | chr8:102,622,642-102,622,737  | 96           | B6>>B10   | AACAGTGATTGTGAGTCTTAGAGCT        | TGAATAGAATTGCCAGAATCCTGT         |                          |  |  |  |  |
| 8                                                        | D8Dcr46  | D8Dcr118.408  | chr8:115,522,531-115,522,626  | 96           | B10>>B6   | CCTTGCAGGGAGAAGCTGAATA           | AAGCTAGAAGGTGGCAGCG              |                          |  |  |  |  |
| 8                                                        | D8Dcr47  | D8Dcr118.613  | chr8:115,727,709-115,727,808  | 100          | B10>>B6   | GGAAGGACTGAACCAATAACAAACTT       | TCACCAGTTGCTCTATTACGCG           |                          |  |  |  |  |
| 8                                                        | D8Dcr48  | D8Dcr118.630  | chr8:115,744,354-115,744,449  | 96           | B10>B6    | AATGCAAGAATCGCCCAA               | GACTGGAGGCTGTCAACAACCT           |                          |  |  |  |  |
| 9                                                        | D9Dcr2   | D9Dcr65.375   | chr9:65,577,857-65,577,972    | 116          | B6>>B10   | CATAGGCAAGTGGTTCACAGAAAT         | GTAAGGGGTAAAGAATGTAAGTTTATA      | D9Mit336                 |  |  |  |  |
| 9                                                        | D9Dcr3   | D9Dcr65.784   | chr9:65,986,191-65,986,295    | 105          | B6>>B10   | CATGACTCTGAATAGATAAGCATTTATCA    | ATCAAAAATATCTTAAGGGCTCTGTGT      |                          |  |  |  |  |
| 9                                                        | D9Dcr6   | D9Dcr67.328   | chr9:67,529,227-67,529,322    | 96           | B6>>B10   | TGCTCTGATCTTAACACGTATGTA         | TTGGCATGAAACAACAGAAACAATA        |                          |  |  |  |  |
| 9                                                        | D9Dcr7   | D9Dcr67.793   | chr9:67,993,744-67,993,852    | 109          | B10>>B6   | CTCAGGCTTACCCACCATCA             | TGCCAACTGTGTATGTTTCTTAAGA        | D9Mit260                 |  |  |  |  |
| 9                                                        | D9Dcr8   | D9Dcr68.628   | chr9:68,828,916-68,829,019    | 104          | B10>>B6   | ATACCTGATGCCTCTCTGACTT           | ATCTGAGTATCATGGAGACTGTAGGAGT     |                          |  |  |  |  |
| 11                                                       | D11Dcr1  | D11Dcr3.215   | chr11:3,315,493-3,315,591     | 99           | B10>B6    | GGAAAAGCTCTGGCCTTGA              | TTTCCGTAAACCTTAACATTGTGT         |                          |  |  |  |  |
| 11                                                       | D11Dcr34 | D11Dcr8.331   | chr11:8,431,175-8,431,272     | 98           | B6>>B10   | CAGACACAGCAGTACACAGGTGC          | ACCCAGACTGTATGTGCATTGT           |                          |  |  |  |  |
| 11                                                       | D11Dcr7  | D11Dcr39.441  | chr11:39,598,310-39,598,413   | 104          | B10>>B6   | GCATCCCTGACATTGTGTGAA            | GGCTAGAGAAAAAGGCACAGAAT          |                          |  |  |  |  |
| 11                                                       | D11Dcr12 | D11Dcr55.733  | chr11:55,889,987-55,890,090   | 104          | B10>>B6   | GATGCTCTAGTCTAATTGAGAATGTAATTA   | GTAATCTCCCAAGTAATTTGTGA          |                          |  |  |  |  |
| 13                                                       | D13Dcr5  | D13Dcr20.347  | chr13:20,255,418-20,255,513   | 96           | B6>>B10   | AGGAAATATGTGTCAITCAGTCAAGTCT     | GGGTGATGAGTGTATCTGCACAG          |                          |  |  |  |  |
| 13                                                       | D13Dcr1  | D13Dcr20.438  | chr13:20,431,332-20,431,458   | 127          | B10>>B6   | GAAGAACATCTTTGCAGAGAACACA        | TAGAGTCACTGTACCTGGAAGCTATT       |                          |  |  |  |  |
| 13                                                       | D13Dcr3  | D13Dcr36.683  | chr13:36,676,310-36,676,405   | 96           | B10>>B6   | AGTGAATGTTTTGTGTGACACA           | CCTCCACATTTCACTATACATTTTGT       |                          |  |  |  |  |
| 14                                                       | D14Dcr7  | D14Dcr116.408 | chr14:117,525,375-117,525,476 | 102          | B10>>B6   | TCTCCACAAGGCTCTCTGTCA            | AACTGGTGAATTAAGCCTAAGTGTGT       |                          |  |  |  |  |
| 14                                                       | D14Dcr9  | D14Dcr117.317 | chr14:118,434,159-118,434,263 | 105          | B6>>B10   | AATCTTCTGTATACCTGCTGTGT          | GCTCAGTCTTCAAATGCACAAAGTT        |                          |  |  |  |  |
| 15                                                       | D15Dcr4  | D15Dcr70.887  | chr15:71,057,532-71,057,629   | 100          | B10>>B6   | GCATCCATGTCTGATCAA               | CAGGCTATGTTCTCAGATAGGATTCATT     |                          |  |  |  |  |
| 18                                                       | D18Dcr3  | D18Dcr77.728  | chr18:77,524,014-77,524,113   | 100          | B10>B6    | AGCAGGCCCTCAGGAAGACT             | CGAGATGCTTACAGCCCAAA             |                          |  |  |  |  |

Figure S1

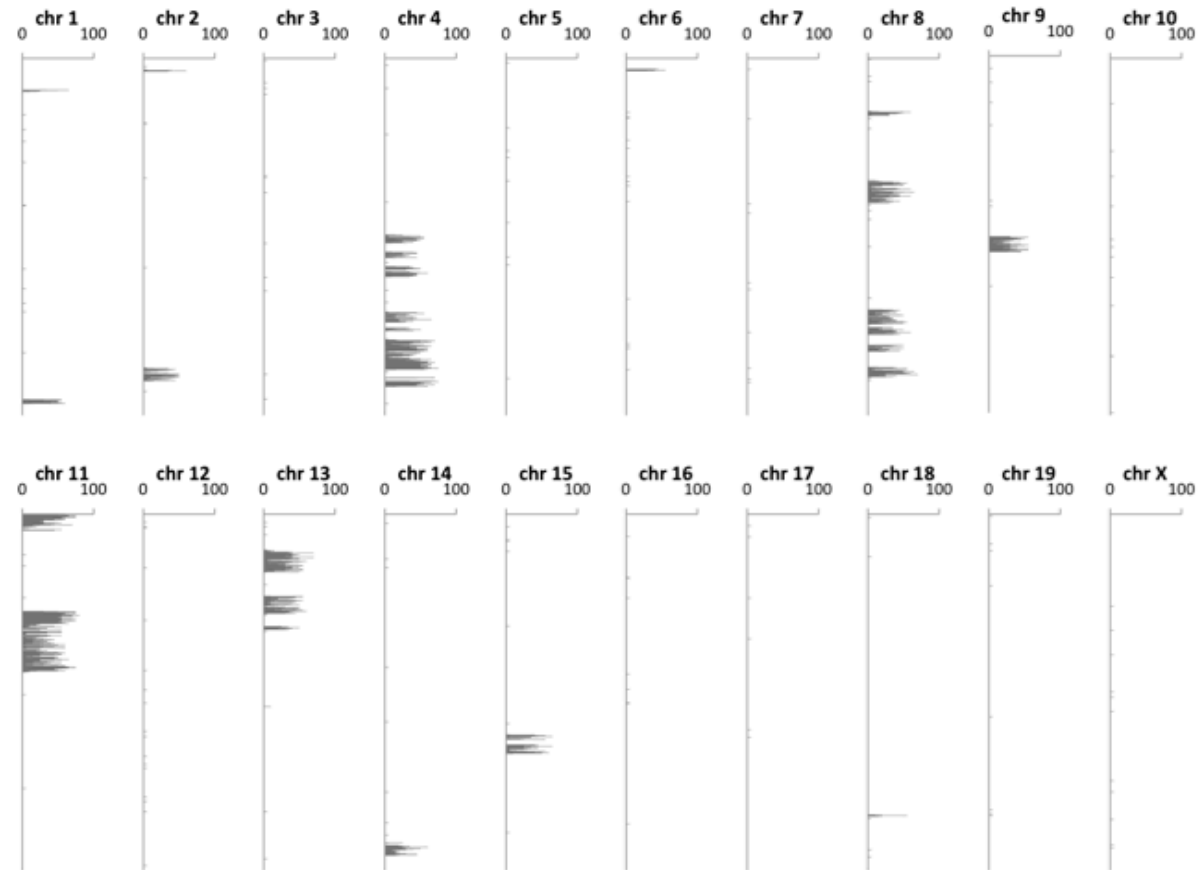

Supplement: NIHMS722986-supplement-Supporting_Information.pdf [file NIHMS722986-supplement-Supporting_Information.pdf]
